# Supplementary material for: Molecular and phenotypic distinctions of macrophages in tolerant and susceptible to hypoxia rats
Source: PeerJ journal article supplement (doi:10.7717/peerj.16052), 2023-10-10
Supplement: Raw_data.zip [file Raw_data.zip]

## Sheet: Figure 1
		CD11b												CD86
	Non-activated macrophages	Tolerant	72.5	66.9	71.3	72.2	60.4						Non-activated macrophages	Tolerant	29	14.1	14	4.1	23.8
		Susceptible	40.1	37.8	30.1	71.1	28.3	21.4						Susceptible	6.4	18.8	10	40.4	29.8	34.6
	LPS-activated macrophages	Tolerant	73.6	80.9	64.1	55.6	68.1						LPS-activated macrophages	Tolerant	19.5	11.5	16.6	11.9	31.6
		Susceptible	47.3	76.9	38.4	81.3	57.4	66.7	31					Susceptible	8.9	36.7	11	17.1	8.8	73.9	53.5
		CD68												CD163
	Non-activated macrophages	Tolerant	8.5	13.7	8.5	43.1	22						Non-activated macrophages	Tolerant	8.7	3.9	5.9	5	6.1
		Susceptible	6.2	12.5	12	16.9	19.6	6.9						Susceptible	2.7	4	3.2	5	7.7	12.6
	LPS-activated macrophages	Tolerant	2.6	5.1	19.4	14.5	4.5						LPS-activated macrophages	Tolerant	2.6	2	3.7	3.1	2.4
		Susceptible	27.7	17.8	4.4	30.4	23.7	13.7	2.1					Susceptible	2.4	0.2	1.5	3.6	2.4	3.7	6.3

## Sheet: Figure 4
		Tolerant									Tolerant
		Non-activated macrophages									LPS-activated macrophages
		MMP9 mRNA	0.0673244	0.0745886	0.0628791	0.0673244	0.0650638				MMP9 mRNA	0.397651	0.440557	0.358924	0.505051	0.814705
		Susceptible
		Non-activated macrophages									LPS-activated macrophages	Susceptible
		MMP9 mRNA	0.0317571	0.0478454	0.222503	0.0915528	0.0160389	0.0855077	0.384299		MMP9 mRNA	0.0567553	0.200834	0.335224	0.505051	0.112375	0.0884787	0.559544

## Sheet: Figure 5
		ССR7 protein
			Non-activated macrophages	LPS-activated macrophages
		Tolerant	186.939	23.2224
		Tolerant	33.6225	69.762
		Tolerant	97.2357	82.1069
		Tolerant	138.48	62.6751
		Tolerant	188.701	90.7003
		Susceptible	121.336	155.315
		Susceptible	54.3831	242.611
		Susceptible	55.8785	374.03
		Susceptible	96.9773	492.989
		Susceptible	111.023	350.403

## Sheet: Figure 6
		Tolerant									Tolerant
		Non-activated macrophages									LPS-activated macrophages
		TGFb mRNA	0.440557	0.760911	0.599102	0.207812	0.735361				TGFb mRNA	1.66916	2.04879	2.60214	0.966422	1.35988
		IL-10 mRNA	0.0196868	0.0171728	0.0196868	0.0196868	0.0155004				IL-10 mRNA	0.152817	0.0947338	0.397651	0.872302	0.12032
		Susceptible
		Non-activated macrophages									LPS-activated macrophages	Susceptible
		TGFb mRNA	0.872302	1.03474	1.1079	0.710669	0.371395	1.05257			TGFb mRNA	1.18622	1.40712	6.11171	3.9204	3.30494	1.22744	0.522598
		IL-10 mRNA	0.0317571	0.0286643	0.0607677	0.0241643	0.00537664	0.0306908	0.0104655		IL-10 mRNA	0.0696636	0.147685	0.128826	0.255076	0.358924	0.282598	0.0328605

## Sheet: Figure 7
		Tolerant									Tolerant
		Non-activated macrophages									LPS-activated macrophages
		HIF-1 mRNA	0.0171728	0.0628791	0.128826	0.0884787	0.00199686				HIF-1 mRNA	0.200834	0.181275	0.559544	0.255076	0.215032
		Susceptible
		Non-activated macrophages									LPS-activated macrophages	Susceptible
		HIF-1 mRNA	0.0196868	0.0884787	0.142726	0.128826	0.0915528				HIF-1 mRNA	0.663744	0.578986	2.43033	0.599102	0.335224

## Sheet: Figure 8
		Tolerant									Tolerant
		Non-activated macrophages									LPS-activated macrophages
		mRNA VEGF	0.0340022	0.0328605	0.0351836	0.0431857	0.0587272				mRNA VEGF	0.021811	0.0696636	0.16362	0.169305	0.238234
		Susceptible
		Non-activated macrophages									LPS-activated macrophages	Susceptible
		mRNA VEGF	0.0210786	0.0160389	0.0190258	0.0126282	0.00519611	0.0110156	0.0306908		mRNA VEGF	0.158126	1	0.578986	0.578986	0.0826365	0.0122042	0.147685
		VEGF protein
			Non-activated macrophages	LPS-activated macrophages
		Tolerant	265.503	164.619
		Tolerant	159.045	241.503
		Tolerant	197.601	134.12
		Tolerant	299.443	101.808
		Tolerant	332.383	175.382
		Susceptible	131.153	186.522
		Susceptible	71.7955	468.944
		Susceptible	103.087	410.568
		Susceptible	83.2241	222.743
		Susceptible	53.2095	105.648

## Sheet: Table 1
		Non-activated macrophages	iNOS protein	HGF protein			LPS-activated macrophages	iNOS protein	HGF protein
		Tolerant	0.000383704	2.18731			Tolerant	0.00768983	0.102842
		Tolerant	12.2502	0.509729			Tolerant	2.93075	1.31968
		Tolerant	7.18958	0.973053			Tolerant	2.02937	3.01297
		Tolerant	40.272	0.141113			Tolerant	50.0355	1.14764
		Tolerant	12.854	0.906155			Tolerant	0.462566	1.19435
		Susceptible	9.14827	0.572763			Susceptible	2.84798	2.50226
		Susceptible	61.4891	0.16974			Susceptible	73.3572	3.87157
		Susceptible	13.6686	0.987491			Susceptible	0.150667	1.74641
		Susceptible	3.86671	0.214522			Susceptible	5.69941	0.60968
		Susceptible	0.323161	0.0266464			Susceptible	0.163692	0.37826

## Sheet: Table 2
		Tolerant									Tolerant
		Non-activated macrophages									LPS-activated macrophages
		HIF-1 mRNA	0.0171728	0.0628791	0.128826	0.0884787	0.00199686				HIF-1 mRNA	0.200834	0.181275	0.559544	0.255076	0.215032
		HIF-2 mRNA	2.79376e-05	0.000349825	0.000374556	0.00012556	0.000364556				HIF-2 mRNA	2.52168e-05	0.31309	0.00041497	0.000216863
		Susceptible
		Non-activated macrophages									LPS-activated macrophages	Susceptible
		HIF-1 mRNA	0.0196868	0.0884787	0.142726	0.128826	0.0915528				HIF-1 mRNA	0.663744	0.578986	2.43033	0.599102	0.335224
		HIF-2 mRNA	0.000429388	0.000202544	0.000492247	0.00041497	0.000459745	0.000716719			HIF-2 mRNA	0.000349825	0.0250039	0.00810047	0.358924	0.00706606	0.000741621

## Sheet: Table 3
		Non-activated macrophages					LPS-activated macrophages
		Tolerant	274.4				Tolerant	1135
		Tolerant	725				Tolerant	643
		Tolerant	1000				Tolerant	1068
		Tolerant	288.5				Tolerant	781
		Tolerant	625				Tolerant	876
		Susceptible	10.72				Susceptible	1065
		Susceptible	500				Susceptible	802
		Susceptible	137.1				Susceptible	1057
		Susceptible	685				Susceptible	1167
		Susceptible	745				Susceptible	689
